# Supplementary material for: The nature and degree of the cooperativity of (η5-C5H5)–metal and metal–CO bonds in half-sandwich complexes of groups 5, 7, 9, and 11 transition metals
Source: Royal Society of Chemistry journal article supplement (doi:10.1039/d4nj03111c), 2024-01-01
Supplement: d4nj03111c1.pdf [file d4nj03111c1.pdf]

## Supporting Information:

### **The nature and degree of the cooperativity of ( $\eta^5$ -C<sub>5</sub>H<sub>5</sub>)-metal and metal-CO bonds in half-sandwich complexes of groups 5, 7, 9, and 11 transition metals**

Samaneh Sanei Movafagh,<sup>a</sup> Yasin Gholiee,<sup>b,\*</sup> Sadegh Salehzadeh<sup>a,\*</sup>

<sup>a</sup> *Department of Inorganic Chemistry, Faculty of Chemistry and Petroleum Sciences, Bu-Ali Sina University, Hamedan, Iran. E-mail: saleh@basu.ac.ir (ORCID ID: 0000-0003-2840-1896)*

<sup>b</sup> *Department of Chemistry, Faculty of Science, Malayer University, Malayer, Iran. E-mail: yasingholiee@malayeru.ac.ir (ORCID ID: 0000-0002-0392-4407)*

## Contents

\* Equations used for calculation of interaction energies, bond dissociation energies, and cooperative energies

**Table S1.** Calculated values for interaction energies (IE, kcal/mol) between the defined fragments frozen in the optimized geometry of the complexes studied here, and related,  $\Delta I E_{\text{coop}}$ ,  $\% \Delta I E_{\text{A-B}}$  and  $\% \Delta I E_{\text{B-C}}$  values in  $[(\eta^5\text{-Cp})\text{Cu}(\text{CO})]$  complex, at 24 levels of theory

**Table S2.** Calculated values for interaction energies (IE, kcal/mol) between the defined fragments frozen in the optimized geometry of the complexes studied here, and related,  $\Delta I E_{\text{coop}}$ ,  $\% \Delta I E_{\text{A-B}}$  and  $\% \Delta I E_{\text{B-C}}$  values in  $[(\eta^5\text{-Cp})\text{Ag}(\text{CO})]$  complex, at 24 levels of theory

**Table S3.** Calculated values for interaction energies (IE, kcal/mol) between the defined fragments frozen in the optimized geometry of the complexes studied here, and related,  $\Delta I E_{\text{coop}}$ ,  $\% \Delta I E_{\text{A-B}}$  and  $\% \Delta I E_{\text{B-C}}$  values in  $[(\eta^5\text{-Cp})\text{Au}(\text{CO})]$  complex, at 24 levels of theory

**Table S4.** Bond dissociation energies, cooperative energies (all in kcal/mol) and the percentages of changes in the bond dissociation energies of A–B and B–C bonds in  $[(\eta^5\text{-Cp})\text{Cu}(\text{CO})]$  complex, at 24 levels of theory

**Table S5.** Bond dissociation energies, cooperative energies (all in kcal/mol) and the percentages of changes in the bond dissociation energies of A–B and B–C bonds in  $[(\eta^5\text{-Cp})\text{Ag}(\text{CO})]$  complex, at 24 levels of theory

**Table S6.** Bond dissociation energies, cooperative energies (all in kcal/mol) and the percentages of changes in the bond dissociation energies of A–B and B–C bonds in  $[(\eta^5\text{-Cp})\text{Au}(\text{CO})]$  complex, at 24 levels of theory

**Table S7.** Computed structural parameters (Å) in  $[(\eta^5\text{-Cp})\text{M}(\text{CO})_n]$  complexes at the M06L/def2-TZVP level of theory

\*\* Cartesian coordinates of the optimized structures

\* The following equations demonstrate how to calculate the bond dissociation energy of A–B, B–C, A–BC and AB–C bonds:

$$-BDE_{A-B} = E_{AB} - (E_A + E_B) \quad (\text{S1})$$

$$-BDE_{B-C} = E_{BC} - (E_B + E_C) \quad (\text{S2})$$

$$-BDE_{A-BC} = E_{ABC} - (E_A + E_{BC}) \quad (\text{S3})$$

$$-BDE_{AB-C} = E_{ABC} - (E_{AB} + E_C) \quad (\text{S4})$$

The following equations demonstrate how to calculate the interaction energies of A–B, B–C, A–BC and AB–C bonds in the structure of an ABC system:

$$IE_{A-B}^{ABC} = E_{AB} - (E_A^{ABC} + E_B^{ABC}) \quad (\text{S5})$$

$$IE_{B-C}^{ABC} = E_{BC} - (E_B^{ABC} + E_C^{ABC}) \quad (\text{S6})$$

$$IE_{A-BC}^{ABC} = E_{ABC} - (E_A^{ABC} + E_{BC}^{ABC}) \quad (\text{S7})$$

$$IE_{AB-C}^{ABC} = E_{ABC} - (E_{AB}^{ABC} + E_C^{ABC}) \quad (\text{S8})$$

In the above equations,  $E_{ABC}$ ,  $E_{AB}$ ,  $E_{BC}$ , and  $E_A$ ,  $E_B$ , and  $E_C$  represent the electronic energies of ABC, AB, BC, A, B, and C, respectively, in their optimized geometries. Meanwhile,  $E_{AB}^{ABC}$ ,  $E_{BC}^{ABC}$ ,  $E_A^{ABC}$ ,  $E_B^{ABC}$  and  $E_C^{ABC}$  denote the electronic energies of AB, BC, A, B and C when frozen in the optimized geometry of ABC.

The calculated BDEs and IEs were subsequently employed in determining the stabilization- and interaction-based cooperative energies within an ABC system. It has been demonstrated that the mutual impacts of chemical bonds can be evaluated by comparing both bond dissociation energies and interaction energies [Ref. 26]. The stabilization-based cooperativity ( $E^{coop}$ ) is calculated using the following equations:

$$\Delta BDE_{A-B} = BDE_{A-B} - BDE_{A-BC} \quad (S9)$$

$$\Delta BDE_{B-C} = BDE_{B-C} - BDE_{AB-C} \quad (S10)$$

$$E_{coop} = \Delta BDE_{A-B} = \Delta BDE_{B-C} \quad (S11)$$

The interaction-based cooperativity ( $\Delta IE^{coop}$ ), on the other hand, is calculated using the following equations [Ref. 26].

$$\Delta IE_{A-B} = IE_{A-BC}^{ABC} - IE_{A-B}^{ABC} \quad (S12)$$

$$\Delta IE_{B-C} = IE_{AB-C}^{ABC} - IE_{B-C}^{ABC} \quad (S13)$$

$$\Delta IE_{coop} = \Delta IE_{A-B} = \Delta IE_{B-C} \quad (S14)$$

In the above equations, the ABC superscript indicates that the interactions are calculated in the optimized geometry of ABC system. In contrast to the stabilization-based approach, this method does not require the optimization of all individual fragments. Indeed, even when there is no information about the independent structures of A, B, and C fragments, such as when a fragment is unstable, the mutual impact of A–B and B–C interactions can still be assessed within the ABC system.

**Table S1.** Calculated values for interaction energies (IE, kcal/mol) between the defined fragments frozen in the optimized geometry of the complexes studied here, and related,  $\Delta IE_{coop}$ <sup>a</sup>,  $\% \Delta IE_{A-B}$  and  $\% \Delta IE_{B-C}$  values<sup>b</sup> in  $[(\eta^5-Cp)Cu(CO)]$  complex, at 24 levels of theory.

| Methods             | $IE_{A-B}^{ABC}$ | $IE_{A-BC}^{ABC}$ | $IE_{B-C}^{ABC}$ | $IE_{AB-C}^{ABC}$ | $\Delta IE_{coop}^a$ | $\% \Delta IE_{A-B}^b$ | $\% \Delta IE_{B-C}^b$ |
|---------------------|------------------|-------------------|------------------|-------------------|----------------------|------------------------|------------------------|
| <b>B3LYP</b>        |                  |                   |                  |                   |                      |                        |                        |
| LanL2DZ             | -188.38          | -195.35           | -38.11           | -45.08            | -6.97                | 4%                     | 18%                    |
| def2-SVP            | -189.93          | -200.74           | -36.75           | -47.56            | -10.81               | 6%                     | 29%                    |
| def2-TZVP           | -187.03          | -195.00           | -35.11           | -43.08            | -7.97                | 4%                     | 23%                    |
| def-QZVP            | -185.23          | -192.92           | -35.21           | -42.90            | -7.69                | 4%                     | 22%                    |
| <b>B971</b>         |                  |                   |                  |                   |                      |                        |                        |
| LanL2DZ             | -188.84          | -196.76           | -36.69           | -44.61            | -7.92                | 4%                     | 22%                    |
| def2-SVP            | -190.10          | -202.26           | -35.11           | -47.27            | -12.16               | 6%                     | 35%                    |
| def2-TZVP           | -188.83          | -197.96           | -34.47           | -43.60            | -9.13                | 5%                     | 26%                    |
| def-QZVP            | -187.09          | -195.76           | -34.65           | -43.32            | -8.67                | 5%                     | 25%                    |
| <b>BP86</b>         |                  |                   |                  |                   |                      |                        |                        |
| LanL2DZ             | -195.68          | -205.06           | -45.90           | -55.28            | -9.38                | 5%                     | 20%                    |
| def2-SVP            | -198.37          | -212.69           | -45.48           | -59.80            | -14.32               | 7%                     | 31%                    |
| def2-TZVP           | -197.55          | -207.95           | -45.25           | -55.65            | -10.40               | 5%                     | 23%                    |
| def-QZVP            | -195.94          | -205.70           | -45.50           | -55.26            | -9.76                | 5%                     | 21%                    |
| <b>M06</b>          |                  |                   |                  |                   |                      |                        |                        |
| LanL2DZ             | -194.11          | -200.81           | -39.60           | -46.30            | -6.70                | 3%                     | 17%                    |
| def2-SVP            | -195.76          | -206.84           | -36.59           | -47.67            | -11.08               | 6%                     | 30%                    |
| def2-TZVP           | -195.15          | -203.34           | -37.19           | -45.38            | -8.19                | 4%                     | 22%                    |
| def-QZVP            | -192.55          | -201.12           | -36.32           | -44.89            | -8.57                | 4%                     | 24%                    |
| <b>M06L</b>         |                  |                   |                  |                   |                      |                        |                        |
| LanL2DZ             | -195.95          | -205.30           | -45.50           | -54.85            | -9.35                | 5%                     | 20%                    |
| def2-SVP            | -194.96          | -211.69           | -40.14           | -56.87            | -16.73               | 9%                     | 42%                    |
| def2-TZVP           | -199.00          | -210.53           | -44.02           | -55.55            | -11.53               | 6%                     | 26%                    |
| def-QZVP            | -195.95          | -209.40           | -41.88           | -55.33            | -13.45               | 7%                     | 32%                    |
| <b>CCSD(T)//MP2</b> |                  |                   |                  |                   |                      |                        |                        |
| LanL2DZ             | -179.09          | -191.97           | -24.80           | -37.68            | -12.88               | 7%                     | 52%                    |
| def2-SVP            | -182.11          | -192.02           | -28.15           | -38.06            | -9.91                | 5%                     | 35%                    |
| def2-TZVP           | -184.91          | -202.54           | -22.71           | -40.34            | -17.63               | 9%                     | 78%                    |
| def-QZVP            | -                | -                 | -                | -                 | -                    | -                      | -                      |

<sup>a</sup> See ref. 26 of the paper. ( $\Delta IE_{coop} = \Delta IE_{A-B} = \Delta IE_{B-C}$ )

$$\% \Delta IE_{A-B} = \frac{|\Delta IE_{coop}|}{IE_{A-B}^{ABC}} \times 100, \quad \% \Delta IE_{B-C} = \frac{|\Delta IE_{coop}|}{IE_{B-C}^{ABC}} \times 100$$

**Table S2.** Calculated values for interaction energies (IE, kcal/mol) between the defined fragments frozen in the optimized geometry of the complexes studied here, and related,  $\Delta IE_{coop}$ <sup>a</sup>,  $\% \Delta IE_{A-B}$  and  $\% \Delta IE_{B-C}$  values<sup>b</sup> in  $[(\eta^5\text{-Cp})\text{Ag}(\text{CO})]$  complex, at 24 levels of theory.

| Methods             | $IE_{A-B}^{ABC}$ | $IE_{A-BC}^{ABC}$ | $IE_{B-C}^{ABC}$ | $IE_{AB-C}^{ABC}$ | $\Delta IE_{coop}$ | $\% \Delta IE_{A-B}$ | $\% \Delta IE_{B-C}$ |
|---------------------|------------------|-------------------|------------------|-------------------|--------------------|----------------------|----------------------|
| <b>B3LYP</b>        |                  |                   |                  |                   |                    |                      |                      |
| LanL2DZ             | -164.68          | -172.67           | -22.89           | -30.88            | -7.99              | 5%                   | 35%                  |
| def2-SVP            | -170.08          | -178.23           | -24.03           | -32.18            | -8.15              | 5%                   | 34%                  |
| def2-TZVP           | -163.84          | -172.50           | -22.40           | -31.06            | -8.66              | 5%                   | 39%                  |
| def-QZVP            | -162.77          | -171.33           | -22.77           | -31.33            | -8.56              | 5%                   | 38%                  |
| <b>B971</b>         |                  |                   |                  |                   |                    |                      |                      |
| LanL2DZ             | -164.30          | -170.92           | -21.96           | -30.98            | -9.02              | 5%                   | 41%                  |
| def2-SVP            | -170.17          | -179.88           | -23.15           | -32.86            | -9.71              | 6%                   | 42%                  |
| def2-TZVP           | -165.64          | -175.78           | -22.20           | -32.34            | -10.14             | 6%                   | 46%                  |
| def-QZVP            | -164.48          | -174.63           | -22.52           | -32.67            | -10.15             | 6%                   | 45%                  |
| <b>BP86</b>         |                  |                   |                  |                   |                    |                      |                      |
| LanL2DZ             | -170.32          | -183.17           | -27.50           | -40.35            | -12.85             | 7%                   | 47%                  |
| def2-SVP            | -176.24          | -189.00           | -30.00           | -42.76            | -12.76             | 7%                   | 42%                  |
| def2-TZVP           | -170.68          | -183.71           | -28.95           | -41.98            | -13.03             | 8%                   | 45%                  |
| def-QZVP            | -169.77          | -182.61           | -29.51           | -42.35            | -12.84             | 8%                   | 43%                  |
| <b>M06</b>          |                  |                   |                  |                   |                    |                      |                      |
| LanL2DZ             | -165.62          | -175.98           | -21.46           | -31.82            | -10.36             | 6%                   | 48%                  |
| def2-SVP            | -169.66          | -180.13           | -21.56           | -32.03            | -10.47             | 6%                   | 49%                  |
| def2-TZVP           | -165.77          | -176.18           | -21.42           | -31.83            | -10.41             | 6%                   | 49%                  |
| def-QZVP            | -165.57          | -174.70           | -22.22           | -31.35            | -9.13              | 5%                   | 41%                  |
| <b>M06L</b>         |                  |                   |                  |                   |                    |                      |                      |
| LanL2DZ             | -163.43          | -178.62           | -21.25           | -36.44            | -15.19             | 9%                   | 71%                  |
| def2-SVP            | -165.93          | -182.34           | -21.29           | -37.70            | -16.41             | 10%                  | 77%                  |
| def2-TZVP           | -165.01          | -181.33           | -22.23           | -38.55            | -16.32             | 10%                  | 73%                  |
| def-QZVP            | -164.25          | -179.87           | -22.83           | -38.45            | -15.62             | 9%                   | 68%                  |
| <b>CCSD(T)//MP2</b> |                  |                   |                  |                   |                    |                      |                      |
| LanL2DZ             | -157.98          | -163.29           | -15.76           | -21.07            | -5.31              | 3%                   | 34%                  |
| def2-SVP            | -167.74          | -178.99           | -14.26           | -25.51            | -11.25             | 7%                   | 79%                  |
| def2-TZVP           | -164.35          | -168.76           | -21.59           | -26.00            | -4.41              | 3%                   | 20%                  |
| def-QZVP            | -                | -                 | -                | -                 | -                  | -                    | -                    |

<sup>a</sup> See ref. 26 of the paper.  $(\Delta IE_{coop} = \Delta IE_{A-B} = \Delta IE_{B-C})$

$$\% \Delta IE_{A-B} = \frac{|\Delta IE_{coop}|}{IE_{A-B}^{ABC}} \times 100, \quad \% \Delta IE_{B-C} = \frac{|\Delta IE_{coop}|}{IE_{B-C}^{ABC}} \times 100$$

**Table S3.** Calculated values for interaction energies (IE, kcal/mol) between the defined fragments frozen in the optimized geometry of the complexes studied here, and related,  $\Delta IE_{coop}$ <sup>a</sup>,  $\% \Delta IE_{A-B}$  and  $\% \Delta IE_{B-C}$  values<sup>b</sup> in  $[(\eta^5\text{-Cp})\text{Au}(\text{CO})]$  complex, at 24 levels of theory.

| Methods             | $IE_{A-B}^{ABC}$ | $IE_{A-BC}^{ABC}$ | $IE_{B-C}^{ABC}$ | $IE_{AB-C}^{ABC}$ | $\Delta IE_{coop}$ | $\% \Delta IE_{A-B}$ | $\% \Delta IE_{B-C}$ |
|---------------------|------------------|-------------------|------------------|-------------------|--------------------|----------------------|----------------------|
| <b>B3LYP</b>        |                  |                   |                  |                   |                    |                      |                      |
| LanL2DZ             | -169.53          | -185.31           | -44.45           | -60.23            | -15.78             | 9%                   | 35%                  |
| def2-SVP            | -175.83          | -192.78           | -43.51           | -60.46            | -16.95             | 10%                  | 39%                  |
| def2-TZVP           | -173.82          | -192.79           | -42.54           | -61.51            | -18.97             | 11%                  | 44%                  |
| def-QZVP            | -172.40          | -190.65           | -44.02           | -62.27            | -18.25             | 11%                  | 41%                  |
| <b>B971</b>         |                  |                   |                  |                   |                    |                      |                      |
| LanL2DZ             | -171.44          | -188.65           | -45.20           | -62.41            | -17.21             | 10%                  | 38%                  |
| def2-SVP            | -177.27          | -196.13           | -44.24           | -63.10            | -18.86             | 11%                  | 43%                  |
| def2-TZVP           | -177.17          | -197.61           | -44.17           | -64.61            | -20.44             | 11%                  | 46%                  |
| def-QZVP            | -175.72          | -195.52           | -45.65           | -65.45            | -19.80             | 11%                  | 43%                  |
| <b>BP86</b>         |                  |                   |                  |                   |                    |                      |                      |
| LanL2DZ             | -181.08          | -194.79           | -57.88           | -71.59            | -13.71             | 7%                   | 24%                  |
| def2-SVP            | -187.08          | -201.23           | -57.89           | -72.04            | -14.15             | 8%                   | 24%                  |
| def2-TZVP           | -185.17          | -201.38           | -56.78           | -72.99            | -16.21             | 9%                   | 28%                  |
| def-QZVP            | -184.08          | -199.45           | -58.36           | -73.73            | -15.37             | 8%                   | 26%                  |
| <b>M06</b>          |                  |                   |                  |                   |                    |                      |                      |
| LanL2DZ             | -171.47          | -190.23           | -36.97           | -55.73            | -18.76             | 11%                  | 51%                  |
| def2-SVP            | -177.27          | -197.10           | -36.83           | -56.66            | -19.83             | 11%                  | 54%                  |
| def2-TZVP           | -176.87          | -197.20           | -37.34           | -57.67            | -20.33             | 11%                  | 54%                  |
| def-QZVP            | -176.74          | -196.90           | -38.36           | -58.52            | -20.16             | 11%                  | 52%                  |
| <b>M06L</b>         |                  |                   |                  |                   |                    |                      |                      |
| LanL2DZ             | -168.59          | -190.59           | -43.41           | -65.41            | -22.00             | 13%                  | 51%                  |
| def2-SVP            | -174.29          | -196.39           | -44.56           | -66.66            | -22.10             | 13%                  | 50%                  |
| def2-TZVP           | -175.71          | -198.67           | -46.08           | -69.04            | -22.96             | 13%                  | 50%                  |
| def-QZVP            | -175.60          | -198.64           | -47.00           | -70.04            | -23.04             | 13%                  | 49%                  |
| <b>CCSD(T)//MP2</b> |                  |                   |                  |                   |                    |                      |                      |
| LanL2DZ             | -163.17          | -185.91           | -27.11           | -49.85            | -22.74             | 14%                  | 84%                  |
| def2-SVP            | -179.46          | -200.89           | -38.95           | -60.38            | -21.43             | 12%                  | 55%                  |
| def2-TZVP           | -183.78          | -205.83           | -43.72           | -65.77            | -22.05             | 12%                  | 50%                  |
| def-QZVP            | -                | -                 | -                | -                 | -                  | -                    | -                    |

<sup>a</sup> See ref. 26 of the paper. ( $\Delta IE_{coop} = \Delta IE_{A-B} = \Delta IE_{B-C}$ )

$$\% \Delta IE_{A-B} = \frac{|\Delta IE_{coop}|}{IE_{A-B}^{ABC}} \times 100, \quad \% \Delta IE_{B-C} = \frac{|\Delta IE_{coop}|}{IE_{B-C}^{ABC}} \times 100$$

**Table S4.** Bond dissociation energies, cooperative energies<sup>a</sup> (all in kcal/mol) and the percentages of changes in the bond dissociation energies of A–B and B–C bonds<sup>b</sup> in  $[(\eta^5\text{-Cp})\text{Cu}(\text{CO})]$  complex, at 24 levels of theory.

| Methods             | $-BDE_{A-B}$ | $-BDE_{A-BC}$ | $-BDE_{B-C}$ | $-BDE_{AB-C}$ | $E_{coop}$ | $\% \Delta BDE_{A-B}$ | $\% \Delta BDE_{B-C}$ |
|---------------------|--------------|---------------|--------------|---------------|------------|-----------------------|-----------------------|
| <b>B3LYP</b>        |              |               |              |               |            |                       |                       |
| LanL2DZ             | -187.86      | -192.88       | -39.95       | -44.97        | -5.02      | 3%                    | 13%                   |
| def2-SVP            | -189.71      | -197.94       | -39.02       | -47.25        | -8.23      | 4%                    | 21%                   |
| def2-TZVP           | -186.65      | -192.27       | -37.33       | -42.95        | -5.62      | 3%                    | 15%                   |
| def2-QZVP           | -185.02      | -190.13       | -37.49       | -42.60        | -5.11      | 3%                    | 14%                   |
| <b>B971</b>         |              |               |              |               |            |                       |                       |
| LanL2DZ             | -188.28      | -194.20       | -38.59       | -44.51        | -5.92      | 3%                    | 15%                   |
| def2-SVP            | -189.83      | -199.35       | -37.46       | -46.98        | -9.52      | 5%                    | 25%                   |
| def2-TZVP           | -188.54      | -195.16       | -36.74       | -43.36        | -6.62      | 3%                    | 18%                   |
| def2-QZVP           | -186.81      | -193.02       | -36.85       | -43.06        | -6.21      | 3%                    | 17%                   |
| <b>BP86</b>         |              |               |              |               |            |                       |                       |
| LanL2DZ             | -195.30      | -202.95       | -47.33       | -54.98        | -7.65      | 4%                    | 16%                   |
| def2-SVP            | -198.42      | -210.42       | -47.03       | -59.03        | -12.00     | 6%                    | 25%                   |
| def2-TZVP           | -197.45      | -205.78       | -46.72       | -55.05        | -8.33      | 4%                    | 18%                   |
| def2-QZVP           | -195.91      | -203.56       | -46.93       | -54.58        | -7.65      | 4%                    | 16%                   |
| <b>M06</b>          |              |               |              |               |            |                       |                       |
| LanL2DZ             | -193.55      | -198.49       | -41.26       | -46.20        | -4.94      | 3%                    | 12%                   |
| def2-SVP            | -195.46      | -204.09       | -38.78       | -47.41        | -8.63      | 4%                    | 22%                   |
| def2-TZVP           | -194.82      | -200.88       | -39.11       | -45.17        | -6.06      | 3%                    | 15%                   |
| def2-QZVP           | -192.27      | -198.61       | -38.31       | -44.65        | -6.34      | 3%                    | 16%                   |
| <b>M06L</b>         |              |               |              |               |            |                       |                       |
| LanL2DZ             | -195.47      | -202.92       | -47.08       | -54.53        | -7.45      | 4%                    | 16%                   |
| def2-SVP            | -194.85      | -209.04       | -42.04       | -56.23        | -14.19     | 7%                    | 34%                   |
| def2-TZVP           | -198.91      | -208.17       | -45.66       | -54.92        | -9.26      | 5%                    | 20%                   |
| def2-QZVP           | -195.86      | -207.00       | -43.53       | -54.67        | -11.14     | 6%                    | 26%                   |
| <b>CCSD(T)//MP2</b> |              |               |              |               |            |                       |                       |
| LanL2DZ             | -178.60      | -185.76       | -30.20       | -37.36        | -7.16      | 4%                    | 24%                   |
| def2-SVP            | -182.11      | -192.02       | -28.15       | -38.06        | -9.91      | 5%                    | 35%                   |
| def2-TZVP           | -185.25      | -194.32       | -30.27       | -39.34        | -9.07      | 5%                    | 30%                   |
| def2-QZVP           | -            | -             | -            | -             | -          | -                     | -                     |

<sup>a</sup> See ref. 26 of the paper. ( $E_{coop} = \Delta BDE_{A-B} = \Delta BDE_{B-C}$ ).

$$\text{\%} \Delta BDE_{A-B} = \frac{|E_{coop}|}{BDE_{A-B}} \times 100, \text{\%} \Delta BDE_{B-C} = \frac{|E_{coop}|}{BDE_{B-C}} \times 100$$



**Table S5.** Bond dissociation energies, cooperative energies<sup>a</sup> (all in kcal/mol) and the percentages of changes in the bond dissociation energies of A–B and B–C bonds<sup>b</sup> in  $[(\eta^5\text{-Cp})\text{Ag}(\text{CO})]$  complex, at 24 levels of theory.

| Methods             | $-BDE_{A-B}$ | $-BDE_{A-BC}$ | $-BDE_{B-C}$ | $-BDE_{AB-C}$ | $E_{coop}$ | $\% \Delta BDE_{A-B}$ | $\% \Delta BDE_{B-C}$ |
|---------------------|--------------|---------------|--------------|---------------|------------|-----------------------|-----------------------|
| <b>B3LYP</b>        |              |               |              |               |            |                       |                       |
| LanL2DZ             | -164.24      | -168.90       | -26.05       | -30.71        | -4.66      | 3%                    | 18%                   |
| def2-SVP            | -169.76      | -174.22       | -27.43       | -31.89        | -4.46      | 3%                    | 16%                   |
| def2-TZVP           | -163.68      | -168.64       | -25.79       | -30.75        | -4.96      | 3%                    | 19%                   |
| def2-QZVP           | -162.64      | -167.42       | -26.23       | -31.01        | -4.78      | 3%                    | 18%                   |
| <b>B971</b>         |              |               |              |               |            |                       |                       |
| LanL2DZ             | -172.68      | -169.84       | -25.41       | -22.57        | 2.84       | 2%                    | 11%                   |
| def2-SVP            | -169.88      | -175.62       | -26.80       | -32.54        | -5.74      | 3%                    | 21%                   |
| def2-TZVP           | -165.45      | -171.65       | -25.85       | -32.05        | -6.20      | 4%                    | 24%                   |
| def2-QZVP           | -164.35      | -170.45       | -26.23       | -32.33        | -6.10      | 4%                    | 23%                   |
| <b>BP86</b>         |              |               |              |               |            |                       |                       |
| LanL2DZ             | -169.93      | -179.62       | -30.42       | -40.11        | -9.69      | 6%                    | 32%                   |
| def2-SVP            | -176.01      | -185.37       | -32.94       | -42.30        | -9.36      | 5%                    | 28%                   |
| def2-TZVP           | -170.56      | -180.27       | -31.82       | -41.53        | -9.71      | 6%                    | 30%                   |
| def2-QZVP           | -169.68      | -179.13       | -32.40       | -41.85        | -9.45      | 6%                    | 29%                   |
| <b>M06</b>          |              |               |              |               |            |                       |                       |
| LanL2DZ             | -165.14      | -172.24       | -24.51       | -31.61        | -7.10      | 4%                    | 29%                   |
| def2-SVP            | -169.39      | 176.14        | -24.97       | -31.72        | -6.75      | 4%                    | 27%                   |
| def2-TZVP           | -165.55      | -172.48       | -24.64       | -31.57        | -6.93      | 4%                    | 28%                   |
| def2-QZVP           | -165.40      | -170.86       | -25.59       | -31.05        | -5.46      | 3%                    | 21%                   |
| <b>M06L</b>         |              |               |              |               |            |                       |                       |
| LanL2DZ             | -168.82      | -174.45       | -24.71       | -30.34        | -5.63      | 3%                    | 23%                   |
| def2-SVP            | -170.86      | -177.69       | -25.30       | -32.13        | -6.83      | 4%                    | 27%                   |
| def2-TZVP           | -164.84      | -177.00       | -25.99       | -38.15        | -12.16     | 7%                    | 47%                   |
| def2-QZVP           | -164.20      | -175.41       | -26.74       | -37.95        | -11.21     | 7%                    | 42%                   |
| <b>CCSD(T)//MP2</b> |              |               |              |               |            |                       |                       |
| LanL2DZ             | -157.48      | -158.57       | -19.67       | -20.76        | -1.09      | <1%                   | 6%                    |
| def2-SVP            | -167.85      | -176.53       | -21.26       | -29.94        | -8.68      | 5%                    | 41%                   |
| def2-TZVP           | -164.35      | -168.76       | -21.59       | -26.00        | -4.41      | 3%                    | 20%                   |
| def2-QZVP           | -            | -             | -            | -             | -          | -                     | -                     |

<sup>a</sup> See ref. 26 of the paper. ( $E_{coop} = \Delta BDE_{A-B} - \Delta BDE_{B-C}$ ).

$$\text{\%} \Delta BDE_{A-B} = \frac{|E_{coop}|}{BDE_{A-B}} \times 100, \quad \text{\%} \Delta BDE_{B-C} = \frac{|E_{coop}|}{BDE_{B-C}} \times 100$$

**Table S6.** Bond dissociation energies, cooperative energies<sup>a</sup> (all in kcal/mol) and the percentages of changes in the bond dissociation energies of A–B and B–C bonds<sup>b</sup> in  $[(\eta^5\text{-Cp})\text{Au}(\text{CO})]$  complex, at 24 levels of theory.

| Methods             | $-BDE_{A-B}$ | $-BDE_{A-BC}$ | $-BDE_{B-C}$ | $-BDE_{AB-C}$ | $E_{coop}$ | $\% \Delta BDE_{A-B}$ | $\% \Delta BDE_{B-C}$ |
|---------------------|--------------|---------------|--------------|---------------|------------|-----------------------|-----------------------|
| <b>B3LYP</b>        |              |               |              |               |            |                       |                       |
| LanL2DZ             | -172.76      | -182.43       | -48.79       | -58.46        | -9.67      | 6%                    | 20%                   |
| def2-SVP            | -177.14      | -187.05       | -47.98       | -57.89        | -9.91      | 6%                    | 21%                   |
| def2-TZVP           | -174.57      | -186.77       | -46.95       | -59.15        | -12.20     | 7%                    | 26%                   |
| def-QZVP            | -173.13      | -184.90       | -48.15       | -59.92        | -11.77     | 7%                    | 24%                   |
| <b>B971</b>         |              |               |              |               |            |                       |                       |
| LanL2DZ             | -174.90      | -186.19       | -49.31       | -60.60        | -11.29     | 6%                    | 23%                   |
| def2-SVP            | -178.77      | -190.92       | -48.45       | -60.60        | -12.15     | 7%                    | 25%                   |
| def2-TZVP           | -180.47      | -194.72       | -48.97       | -63.22        | -14.25     | 8%                    | 29%                   |
| def-QZVP            | -176.60      | -190.31       | -49.50       | -63.21        | -13.71     | 8%                    | 28%                   |
| <b>BP86</b>         |              |               |              |               |            |                       |                       |
| LanL2DZ             | -184.66      | -194.51       | -60.48       | -70.33        | -9.85      | 5%                    | 16%                   |
| def2-SVP            | -188.79      | -198.24       | -60.60       | -70.05        | -9.45      | 5%                    | 16%                   |
| def2-TZVP           | -186.31      | -198.04       | -59.47       | -71.20        | -11.73     | 6%                    | 20%                   |
| def-QZVP            | -185.17      | -196.34       | -60.77       | -71.94        | -11.17     | 6%                    | 18%                   |
| <b>M06</b>          |              |               |              |               |            |                       |                       |
| LanL2DZ             | -173.91      | -185.60       | -45.52       | -54.21        | -11.69     | 7%                    | 26%                   |
| def2-SVP            | -177.84      | -190.00       | -42.32       | -54.48        | -12.16     | 7%                    | 29%                   |
| def2-TZVP           | -176.80      | -189.69       | -42.74       | -55.63        | -12.89     | 7%                    | 30%                   |
| def-QZVP            | -176.66      | -189.58       | -43.56       | -56.48        | -12.92     | 7%                    | 30%                   |
| <b>M06L</b>         |              |               |              |               |            |                       |                       |
| LanL2DZ             | -171.04      | -188.19       | -47.00       | -64.15        | -17.15     | 10%                   | 36%                   |
| def2-SVP            | -174.84      | -191.20       | -48.35       | -64.71        | -16.36     | 9%                    | 34%                   |
| def2-TZVP           | -175.73      | -193.36       | -49.63       | -67.26        | -17.63     | 10%                   | 35%                   |
| def-QZVP            | -175.61      | -193.56       | -50.33       | -68.28        | -17.95     | 10%                   | 36%                   |
| <b>CCSD(T)//MP2</b> |              |               |              |               |            |                       |                       |
| LanL2DZ             | -168.80      | -182.44       | -33.74       | -47.38        | -13.64     | 8%                    | 40%                   |
| def2-SVP            | -181.02      | -195.83       | -43.38       | -58.19        | -14.81     | 8%                    | 34%                   |
| def2-TZVP           | -185.25      | -194.32       | -30.27       | -39.34        | -9.07      | 5%                    | 30%                   |
| def-QZVP            | -            | -             | -            | -             | -          | -                     | -                     |

<sup>a</sup> See ref. 26 of the paper. ( $E_{coop} = \Delta BDE_{A-B} = \Delta BDE_{B-C}$ ).

$$\text{\%} \Delta BDE_{A-B} = \frac{|E_{coop}|}{BDE_{A-B}} \times 100, \quad \text{\%} \Delta BDE_{B-C} = \frac{|E_{coop}|}{BDE_{B-C}} \times 100$$

**Table S7.** Computed structural parameters (Å) in  $[(\eta^5\text{-Cp})\text{M}(\text{CO})_n]$  complexes at the M06L/def2-TZVP level of theory.

| Complex                                                 | Dyad                |                   |                  | Triad  |       |       |
|---------------------------------------------------------|---------------------|-------------------|------------------|--------|-------|-------|
|                                                         | M...Cp <sup>a</sup> | M-CO <sup>b</sup> | C=O <sup>c</sup> | M...Cp | M-CO  | C=O   |
| $[(\eta^5\text{-Cp})\text{Cu}(\text{CO})]$              | 1.763               | 1.854             | 1.119            | 1.800  | 1.765 | 1.142 |
| $[(\eta^5\text{-Cp})\text{Ag}(\text{CO})]$              | 2.147               | 2.152             | 1.117            | 2.112  | 1.949 | 1.138 |
| $[(\eta^5\text{-Cp})\text{Au}(\text{CO})]^{\text{d}}$   | 2.035               | 1.885             | 1.129            | 2.014  | 1.804 | 1.155 |
| $[(\eta^5\text{-Cp})\text{Co}(\text{CO})_2]$            | 1.584               | 1.746             | 1.130            | 1.688  | 1.738 | 1.150 |
| $[(\eta^5\text{-Cp})\text{Rh}(\text{CO})_2]$            | 1.780               | 1.826             | 1.131            | 1.938  | 1.856 | 1.148 |
| $[(\eta^5\text{-Cp})\text{Ir}(\text{CO})_2]$            | 2.042               | 1.825             | 1.139            | 1.967  | 1.860 | 1.157 |
| $[(\eta^5\text{-Cp})\text{Mn}(\text{CO})_3]^{\text{d}}$ | 1.546               | 1.822             | 1.134            | 1.767  | 1.796 | 1.151 |
| $[(\eta^5\text{-Cp})\text{Tc}(\text{CO})_3]$            | 1.681               | 1.880             | 1.138            | 1.972  | 1.910 | 1.152 |
| $[(\eta^5\text{-Cp})\text{Re}(\text{CO})_3]$            | 1.689               | 1.891             | 1.140            | 1.978  | 1.926 | 1.154 |
| $[(\eta^5\text{-Cp})\text{V}(\text{CO})_4]$             | 1.805               | 1.955             | 1.137            | 1.914  | 1.946 | 1.150 |
| $[(\eta^5\text{-Cp})\text{Nb}(\text{CO})_4]$            | 1.941               | 2.072             | 1.138            | 2.107  | 2.103 | 1.149 |
| $[(\eta^5\text{-Cp})\text{Ta}(\text{CO})_4]$            | 1.950               | 2.065             | 1.140            | 2.110  | 2.103 | 1.515 |

<sup>a</sup>Distance from the center of the ring on Cp ligand coordinated to metal ion.

<sup>b</sup>Average bond length of M-CO

<sup>c</sup>Average bond length of C=O

<sup>d</sup> M06L//MP2/def2-TZVP

Bond length for a free CO ligand is equal to 1.128 Å, at M06L/def2-TZVP level of theory.

\*\* Cartesian coordinates of the optimized structures, at M06L/def2-TZVP level of theory.

| <b>[(<math>\eta^5</math>-Cp)Cu(CO)]</b> |              |              |              | <b>[(<math>\eta^5</math>-Cp)Ag(CO)]</b>             |              |              |              |
|-----------------------------------------|--------------|--------------|--------------|-----------------------------------------------------|--------------|--------------|--------------|
| 29                                      | -0.374215000 | 0.000000000  | 0.001154000  | 47                                                  | -0.392312000 | -0.000885000 | 0.000542000  |
| 8                                       | -3.281482000 | 0.000338000  | -0.000545000 | 8                                                   | -3.479077000 | 0.001234000  | -0.000743000 |
| 6                                       | -2.139438000 | 0.000668000  | 0.000870000  | 6                                                   | -2.341239000 | -0.000338000 | 0.000433000  |
| 6                                       | 1.424214000  | 0.583242000  | -1.057061000 | 6                                                   | 1.719297000  | 0.711918000  | 0.972515000  |
| 6                                       | 1.423404000  | -0.824593000 | -0.882125000 | 6                                                   | 1.717611000  | 1.146439000  | -0.375965000 |
| 6                                       | 1.425386000  | -1.093024000 | 0.510662000  | 6                                                   | 1.718446000  | -0.002129000 | -1.205790000 |
| 6                                       | 1.427683000  | 0.148748000  | 1.196135000  | 6                                                   | 1.720373000  | -1.146437000 | -0.370066000 |
| 6                                       | 1.426842000  | 1.184643000  | 0.227440000  | 6                                                   | 1.721622000  | -0.704986000 | 0.976149000  |
| 1                                       | 1.432521000  | 1.104551000  | -2.000925000 | 1                                                   | 1.746483000  | 1.347743000  | 1.843462000  |
| 1                                       | 1.431289000  | -1.561401000 | -1.669422000 | 1                                                   | 1.743936000  | 2.171179000  | -0.711724000 |
| 1                                       | 1.435202000  | -2.069304000 | 0.968251000  | 1                                                   | 1.744708000  | -0.004662000 | -2.284211000 |
| 1                                       | 1.439255000  | 0.281916000  | 2.266037000  | 1                                                   | 1.748687000  | -2.172875000 | -0.700892000 |
| 1                                       | 1.437263000  | 2.243441000  | 0.431424000  | 1                                                   | 1.750798000  | -1.336452000 | 1.850201000  |
| <b>[(<math>\eta^5</math>-Cp)Au(CO)]</b> |              |              |              | <b>[(<math>\eta^5</math>-Cp)Co(CO)<sub>2</sub>]</b> |              |              |              |
| 79                                      | 0.281534000  | -0.000431000 | -0.000734000 | 27                                                  | -0.138549000 | -0.001765000 | 0.000125000  |
| 8                                       | 3.241263000  | 0.001552000  | 0.002643000  | 8                                                   | -2.157153000 | -2.065311000 | -0.000492000 |
| 6                                       | 2.085831000  | 0.000893000  | 0.001717000  | 8                                                   | -2.127507000 | 2.092758000  | -0.000473000 |
| 6                                       | -1.731603000 | -1.205413000 | 0.130565000  | 6                                                   | -1.355337000 | -1.241197000 | 0.000243000  |
| 6                                       | -1.730884000 | -0.495574000 | -1.106046000 | 6                                                   | -1.337072000 | 1.258036000  | 0.000270000  |
| 6                                       | -1.731730000 | 0.899823000  | -0.812943000 | 6                                                   | 1.555390000  | 0.956775000  | -0.719401000 |
| 6                                       | -1.733029000 | 1.052212000  | 0.604583000  | 6                                                   | 1.560600000  | -0.376190000 | -1.163090000 |
| 6                                       | -1.732978000 | -0.248724000 | 1.187642000  | 6                                                   | 1.515301000  | -1.201977000 | 0.000412000  |
| 1                                       | -1.744418000 | -2.279620000 | 0.246119000  | 6                                                   | 1.560680000  | -0.375488000 | 1.163394000  |
| 1                                       | -1.743486000 | -0.937438000 | -2.091960000 | 6                                                   | 1.555401000  | 0.957218000  | 0.718867000  |
| 1                                       | -1.744547000 | 1.700927000  | -1.537861000 | 1                                                   | 1.544417000  | 1.836077000  | -1.343034000 |
| 1                                       | -1.746253000 | 1.989205000  | 1.142473000  | 1                                                   | 1.560672000  | -0.714595000 | -2.185698000 |
| 1                                       | -1.746232000 | -0.470771000 | 2.244983000  | 1                                                   | 1.477903000  | -2.280095000 | 0.000741000  |
|                                         |              |              |              | 1                                                   | 1.560869000  | -0.713255000 | 2.186209000  |
|                                         |              |              |              | 1                                                   | 1.544469000  | 1.836902000  | 1.341965000  |

**$[(\eta^5\text{-Cp})\text{Rh}(\text{CO})_2]$** 

|    |              |              |              |
|----|--------------|--------------|--------------|
| 45 | -0.162211000 | 0.000049000  | 0.003642000  |
| 8  | -2.315582000 | -2.093420000 | -0.007340000 |
| 8  | -2.308866000 | 2.104511000  | -0.007637000 |
| 6  | -1.492011000 | -1.292595000 | -0.006246000 |
| 6  | -1.487173000 | 1.302125000  | -0.004584000 |
| 6  | 1.798544000  | 0.824538000  | -0.877138000 |
| 6  | 1.798247000  | -0.559370000 | -1.079687000 |
| 6  | 1.728354000  | -1.180367000 | 0.210233000  |
| 6  | 1.789477000  | -0.172785000 | 1.210571000  |
| 6  | 1.762368000  | 1.066396000  | 0.539450000  |
| 1  | 1.813927000  | 1.583147000  | -1.643094000 |
| 1  | 1.809876000  | -1.070377000 | -2.028274000 |
| 1  | 1.719634000  | -2.244190000 | 0.390043000  |
| 1  | 1.795545000  | -0.326642000 | 2.276412000  |
| 1  | 1.769267000  | 2.039500000  | 1.005246000  |

 **$[(\eta^5\text{-Cp})\text{Ir}(\text{CO})_2]$** 

|    |              |              |              |
|----|--------------|--------------|--------------|
| 77 | -0.133270000 | -0.001111000 | 0.002936000  |
| 8  | -2.283206000 | -2.116469000 | -0.009893000 |
| 8  | -2.262608000 | 2.139851000  | -0.009841000 |
| 6  | -1.469602000 | -1.292906000 | -0.008371000 |
| 6  | -1.458608000 | 1.307440000  | -0.007421000 |
| 6  | 1.860675000  | 0.835422000  | -0.872407000 |
| 6  | 1.857842000  | -0.558102000 | -1.086068000 |
| 6  | 1.787599000  | -1.190942000 | 0.202101000  |
| 6  | 1.837523000  | -0.183296000 | 1.214061000  |
| 6  | 1.822485000  | 1.069372000  | 0.546727000  |
| 1  | 1.877785000  | 1.603543000  | -1.643464000 |
| 1  | 1.869813000  | -1.063837000 | -2.049416000 |
| 1  | 1.781364000  | -2.265893000 | 0.377243000  |
| 1  | 1.840665000  | -0.344401000 | 2.289652000  |
| 1  | 1.831212000  | 2.047167000  | 1.026065000  |

 **$[(\eta^5\text{-Cp})\text{Mn}(\text{CO})_3]$** 

|    |              |              |              |
|----|--------------|--------------|--------------|
| 25 | -0.049013000 | 0.000096000  | -0.000602000 |
| 8  | -1.665183000 | -1.800735000 | -1.682122000 |
| 8  | -1.635204000 | 2.373234000  | -0.731052000 |
| 8  | -1.695617000 | -0.544790000 | 2.381894000  |
| 6  | -1.049478000 | -1.088964000 | -1.019487000 |
| 6  | -1.033070000 | 1.436077000  | -0.441227000 |
| 6  | -1.067521000 | -0.327607000 | 1.442363000  |
| 6  | 1.719161000  | 1.063773000  | 0.566505000  |
| 6  | 1.728923000  | 0.842739000  | -0.841037000 |
| 6  | 1.723398000  | -0.549091000 | -1.065635000 |
| 6  | 1.707741000  | -1.204884000 | 0.197036000  |
| 6  | 1.711527000  | -0.201269000 | 1.196806000  |
| 1  | 1.721056000  | 2.021729000  | 1.060030000  |
| 1  | 1.727321000  | 1.606628000  | -1.601725000 |
| 1  | 1.712130000  | -1.034098000 | -2.028454000 |
| 1  | 1.703369000  | -2.269280000 | 0.362440000  |
| 1  | 1.685404000  | -0.373694000 | 2.261047000  |

 **$[(\eta^5\text{-Cp})\text{Tc}(\text{CO})_3]$** 

|    |              |              |              |
|----|--------------|--------------|--------------|
| 43 | -0.058234000 | -0.000001000 | 0.000247000  |
| 8  | -1.805694000 | -1.783357000 | -1.771699000 |
| 8  | -1.794361000 | 2.432968000  | -0.662257000 |
| 8  | -1.818900000 | -0.640819000 | 2.421590000  |
| 6  | -1.173999000 | -1.099224000 | -1.093075000 |
| 6  | -1.168199000 | 1.500220000  | -0.406249000 |
| 6  | -1.183504000 | -0.393653000 | 1.492872000  |
| 6  | 1.912870000  | 1.051043000  | 0.597038000  |
| 6  | 1.915926000  | 0.879476000  | -0.818298000 |
| 6  | 1.914592000  | -0.504741000 | -1.091616000 |
| 6  | 1.911529000  | -1.205365000 | 0.148088000  |
| 6  | 1.911665000  | -0.236721000 | 1.182895000  |
| 1  | 1.933302000  | 1.990867000  | 1.124179000  |
| 1  | 1.923341000  | 1.669788000  | -1.551611000 |
| 1  | 1.916535000  | -0.956009000 | -2.070924000 |
| 1  | 1.933296000  | -2.274882000 | 0.275822000  |
| 1  | 1.903963000  | -0.446244000 | 2.240893000  |

| [( $\eta^5$ -Cp)Re(CO) <sub>3</sub> ] |              |              |              | [( $\eta^5$ -Cp)V(CO) <sub>4</sub> ] |              |              |              |
|---------------------------------------|--------------|--------------|--------------|--------------------------------------|--------------|--------------|--------------|
| 75                                    | -0.043076000 | -0.000320000 | -0.000003000 | 23                                   | 0.042144000  | -0.000315000 | 0.000135000  |
| 8                                     | -1.803147000 | -2.168460000 | -1.297500000 | 6                                    | 1.902881000  | 1.104021000  | -0.563442000 |
| 8                                     | -1.798663000 | 2.209343000  | -1.231315000 | 6                                    | 1.940840000  | -0.160689000 | -1.200443000 |
| 8                                     | -1.817631000 | -0.036714000 | 2.516323000  | 6                                    | 2.000257000  | -1.152507000 | -0.197774000 |
| 6                                     | -1.174964000 | -1.337678000 | -0.800149000 | 6                                    | -0.896343000 | -1.629236000 | -0.510573000 |
| 6                                     | -1.172113000 | 1.362389000  | -0.759942000 | 6                                    | -0.938979000 | 0.500611000  | -1.601982000 |
| 6                                     | -1.184948000 | -0.022998000 | 1.551079000  | 8                                    | -1.443812000 | -2.593130000 | -0.816369000 |
| 6                                     | 1.935013000  | 1.167857000  | 0.325903000  | 8                                    | -1.509617000 | 0.801885000  | -2.554170000 |
| 6                                     | 1.937888000  | 0.657963000  | -1.008154000 | 1                                    | 1.870464000  | 2.061884000  | -1.055805000 |
| 6                                     | 1.937177000  | -0.752694000 | -0.938342000 | 1                                    | 1.933877000  | -0.336387000 | -2.263618000 |
| 6                                     | 1.934651000  | -1.134091000 | 0.436049000  | 1                                    | 2.033169000  | -2.217236000 | -0.363252000 |
| 6                                     | 1.930079000  | 0.058142000  | 1.206679000  | 6                                    | 1.937000000  | 0.885640000  | 0.836068000  |
| 1                                     | 1.955989000  | 2.207015000  | 0.609847000  | 6                                    | 1.998944000  | -0.509080000 | 1.056181000  |
| 1                                     | 1.948802000  | 1.247278000  | -1.910531000 | 1                                    | 2.030482000  | -0.998069000 | 2.016677000  |
| 1                                     | 1.942214000  | -1.426341000 | -1.779944000 | 6                                    | -0.901063000 | -0.531573000 | 1.620182000  |
| 1                                     | 1.959865000  | -2.141039000 | 0.818068000  | 8                                    | -1.452263000 | -0.844305000 | 2.579694000  |
| 1                                     | 1.922624000  | 0.110389000  | 2.283999000  | 6                                    | -0.942503000 | 1.593067000  | 0.521236000  |
|                                       |              |              |              | 8                                    | -1.515512000 | 2.541669000  | 0.829159000  |
|                                       |              |              |              | 1                                    | 1.926112000  | 1.646582000  | 1.599650000  |

| $[(\eta^5\text{-Cp})\text{Nb}(\text{CO})_4]$ |              |              |              | $[(\eta^5\text{-Cp})\text{Ta}(\text{CO})_4]$ |              |              |              |
|----------------------------------------------|--------------|--------------|--------------|----------------------------------------------|--------------|--------------|--------------|
| 41                                           | -0.058569000 | -0.000627000 | 0.000395000  | 73                                           | -0.049281000 | 0.000820000  | 0.000086000  |
| 8                                            | 1.647496000  | -2.146894000 | 1.751686000  | 8                                            | 1.650429000  | -1.940075000 | 1.984577000  |
| 8                                            | 1.631387000  | 1.749825000  | 2.161385000  | 8                                            | 1.659741000  | 1.971558000  | 1.945799000  |
| 8                                            | 1.674307000  | -1.733075000 | -2.135046000 | 8                                            | 1.679979000  | -1.975118000 | -1.918444000 |
| 6                                            | 1.053682000  | -1.383634000 | 1.130796000  | 6                                            | 1.062298000  | -1.248118000 | 1.277622000  |
| 6                                            | 1.043447000  | 1.127739000  | 1.394662000  | 6                                            | 1.068298000  | 1.268964000  | 1.252178000  |
| 6                                            | 1.070475000  | -1.117787000 | -1.374838000 | 6                                            | 1.081537000  | -1.269354000 | -1.233873000 |
| 6                                            | -2.164690000 | 1.152491000  | -0.342938000 | 6                                            | -2.138221000 | 1.166717000  | -0.336345000 |
| 6                                            | -2.204147000 | 0.660665000  | 0.980611000  | 6                                            | -2.186924000 | 0.664818000  | 0.986116000  |
| 6                                            | -2.189887000 | -0.749065000 | 0.926984000  | 6                                            | -2.197390000 | -0.744823000 | 0.921259000  |
| 6                                            | -2.141248000 | -1.136819000 | -0.432412000 | 6                                            | -2.153944000 | -1.123546000 | -0.439506000 |
| 6                                            | -2.126252000 | 0.041545000  | -1.221928000 | 6                                            | -2.118283000 | 0.058336000  | -1.222964000 |
| 1                                            | -2.178639000 | 2.191428000  | -0.632414000 | 1                                            | -2.143007000 | 2.207288000  | -0.619413000 |
| 1                                            | -2.238363000 | 1.259002000  | 1.877730000  | 1                                            | -2.213640000 | 1.256341000  | 1.887816000  |
| 1                                            | -2.216466000 | -1.414640000 | 1.775518000  | 1                                            | -2.228655000 | -1.416672000 | 1.764629000  |
| 1                                            | -2.144319000 | -2.149491000 | -0.802878000 | 1                                            | -2.165139000 | -2.134196000 | -0.815422000 |
| 1                                            | -2.122014000 | 0.084373000  | -2.299262000 | 1                                            | -2.113806000 | 0.105853000  | -2.300129000 |
| 6                                            | 1.060211000  | 1.386456000  | -1.114239000 | 6                                            | 1.087480000  | 1.238345000  | -1.259910000 |
| 8                                            | 1.658257000  | 2.150827000  | -1.729908000 | 8                                            | 1.688932000  | 1.925319000  | -1.960829000 |
